# Supplementary material
Source: ML conference proceedings conference paper supplement (https://proceedings.neurips.cc/paper_files/paper/2012/hash/838e8afb1ca34354ac209f53d90c3a43-Abstract.html)
Supplement: Supplementary file 1 [file 838e8afb1ca34354ac209f53d90c3a43-Supplemental.zip]

---

# Truly Nonparametric Online Variational Inference for Hierarchical Dirichlet Processes: Supplementary Material

---

**Michael Bryant and Erik B. Sudderth**

Department of Computer Science, Brown University, Providence, RI  
mbryantj@gmail.com, sudderth@cs.brown.edu

## A. Variational objective expansion

$$\begin{aligned}
\mathcal{L}(q) &= \mathbb{E}_q[\log p(\mathbf{w}|\mathbf{z}, \phi)] + \mathbb{E}_q[\log p(\mathbf{z}|\boldsymbol{\pi})] + \mathbb{E}_q[\log p(\boldsymbol{\pi}|\alpha\beta)] + \mathbb{E}_q[\log p(\phi|\eta)] \\
&\quad + \mathbb{E}_q[\log p(\beta|\gamma)] - \mathbb{E}_q[\log q(\mathbf{z}|\boldsymbol{\varphi})] - \mathbb{E}_q[\log q(\boldsymbol{\pi}|\boldsymbol{\theta})] - \mathbb{E}_q[\log q(\phi|\boldsymbol{\lambda})] \\
&= \sum_{j=1}^D \sum_{w=1}^W \sum_{k=1}^{\infty} n_{w(j)} \mathbb{E}_q[\mathbb{I}(z_{jw} = k)] \mathbb{E}_q[\log \phi_{kw}] \\
&\quad + \sum_{j=1}^D \sum_{w=1}^W \sum_{k=1}^{\infty} n_{w(j)} \mathbb{E}_q[\mathbb{I}(z_{jw} = k)] \mathbb{E}_q[\log \pi_{jk}] \\
&\quad + \sum_{j=1}^D \left\{ \log \Gamma(\alpha) - \sum_k \log \Gamma(\alpha\beta_k) + \sum_k (\alpha\beta_k - 1) \mathbb{E}_q[\log \pi_{jk}] \right\} \\
&\quad + \sum_{k=1}^{\infty} \left\{ \log \Gamma(W\eta) - W \log \Gamma(\eta) + \sum_w (\eta - 1) \mathbb{E}_q[\log \phi_{kw}] \right\} \\
&\quad + \left\{ K \log \gamma + (\gamma - 1) \log T_{K+1} - \sum_{k=1}^K \log T_k \right\} \\
&\quad - \sum_{j=1}^D \sum_{w=1}^W \sum_{k=1}^{\infty} n_{w(j)} \mathbb{E}_q[\mathbb{I}(z_{jw} = k)] \log \mathbb{E}_q[\mathbb{I}(z_{jw} = k)] \\
&\quad - \sum_{j=1}^D \left\{ \log \Gamma\left(\sum_k \theta_{jk}\right) - \sum_k \log \Gamma(\theta_{jk}) + \sum_k (\theta_{jk} - 1) \mathbb{E}_q[\log \pi_{jk}] \right\} \\
&\quad - \sum_{k=1}^{\infty} \left\{ \log \Gamma\left(\sum_w \lambda_{kw}\right) - \sum_w \log \Gamma(\lambda_{kw}) + \sum_w (\lambda_{kw} - 1) \mathbb{E}_q[\log \phi_{kw}] \right\}
\end{aligned}$$

The form of the stick-breaking prior (line 5 in equation 2) comes from performing a change of variables from stick-breaking proportions to stick-breaking weights, and truncating the model at  $K$  components. The  $T_k$  are tail sums, and are defined

$$T_k = 1 - \sum_{l=1}^{k-1} \beta_l.$$

See the appendix of [15] for a complete derivation.
